# Supplementary material for: Precise synthesis of copper selenide nanowires with tailored Cu vacancies through photo-induced reduction for thermoelectric applications
Source: Royal Society of Chemistry journal article supplement (doi:10.1039/d4na00156g), 2024-01-01
Supplement: d4na00156g1.pdf [file d4na00156g1.pdf]

## Supporting information

# Precise Synthesis of Copper Selenide Nanowires with Tailored Cu Vacancies through Photo-Induced Reduction for Thermoelectric applications

*Shunya Sakane<sup>a,\*</sup>, Tatsuki Miura<sup>b</sup>, Kazuki Munakata<sup>b</sup>, Yusuke Morikawa<sup>b</sup>, Shunichiro Miwa<sup>b</sup>,  
Riku Yamanaka<sup>c</sup>, Toshiki, Sugai<sup>c</sup>, Akito Ayukawa<sup>a</sup>, Haruhiko Uono<sup>a</sup>, Hideki Tanaka<sup>b,\*</sup>*

a. Graduate School of Science and Engineering, Ibaraki University, 4-12-1, Nakanarusawa-cho, Hitachi, Ibaraki, Japan

b. Faculty of Science and Engineering, Chuo University, 1-13-27, Kasuga, Bunkyo-ku, Tokyo, Japan.

c. Faculty of Science, Toho University, 2-2-1, Miyama, Funabashi-shi, Chiba, Japan

## Supporting Figures

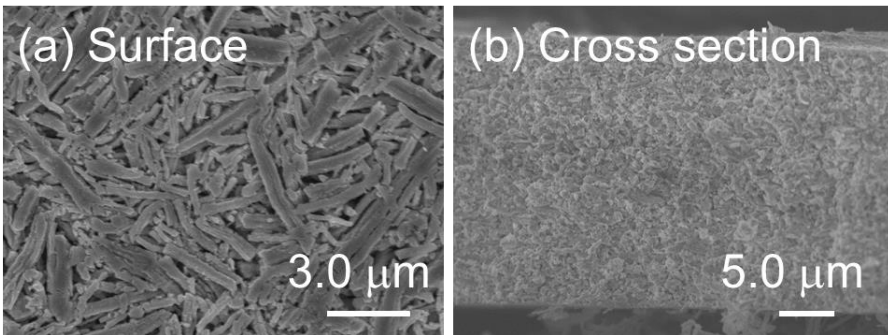

**Fig. S1** (a) Surface and (b) cross sectional SEM images of  $\text{Cu}_{2.00}\text{Se}$  NW films after pressing.

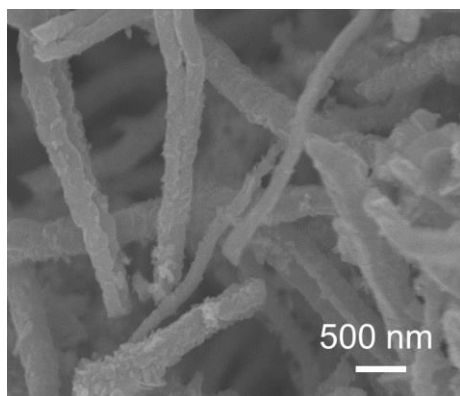

**Fig. S2** A SEM image of  $\text{Cu}_{2.00}\text{Se}$  NW with high magnification.

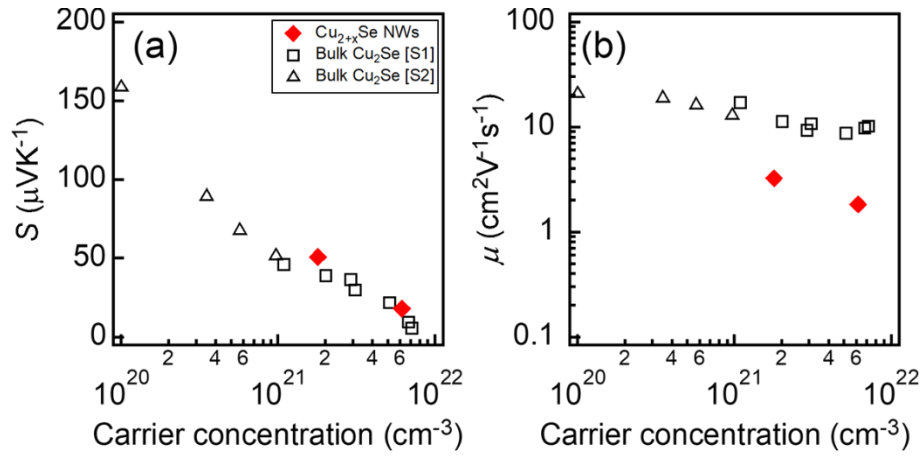

**Fig. S3** (a) Seebeck coefficient ( $S$ ) and (b) Hall mobility ( $\mu$ ) as a function of carrier concentration of  $\text{Cu}_{2+x}\text{Se}$  NWs and bulk  $\text{Cu}_2\text{Se}$  [S1, S2].

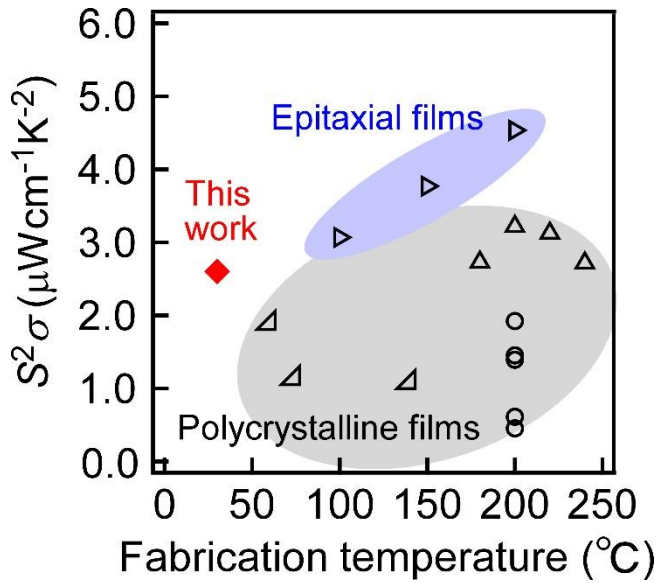

**Fig. S4**  $S^2\sigma$  of  $\text{Cu}_{2.00}\text{Se}$  NWs (this work) as a function of the fabrication temperature, where the data of polycrystalline films [S3-S5] and epitaxial films [S6] were plotted.

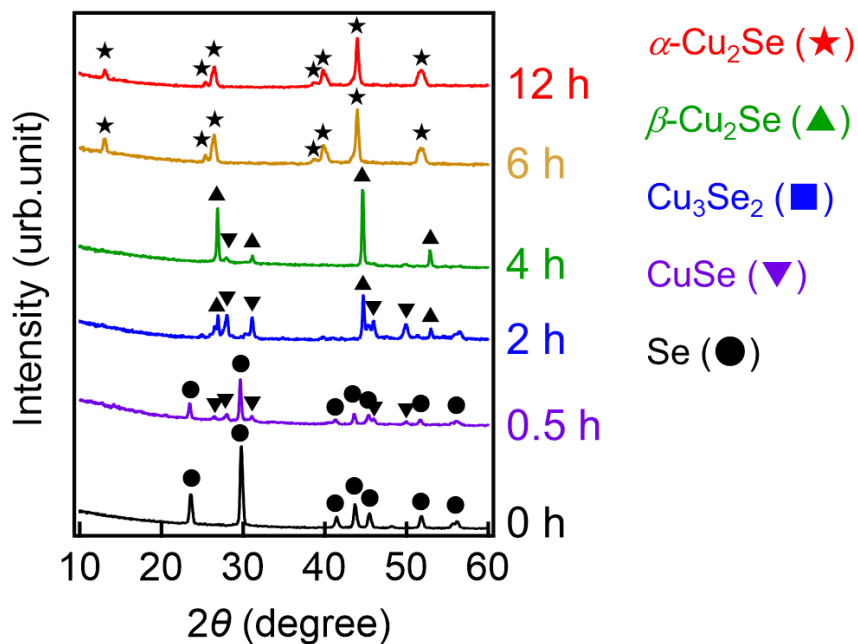

**Fig. S5** XRD patterns of the samples synthesized by light irradiation for 0-12 hours.

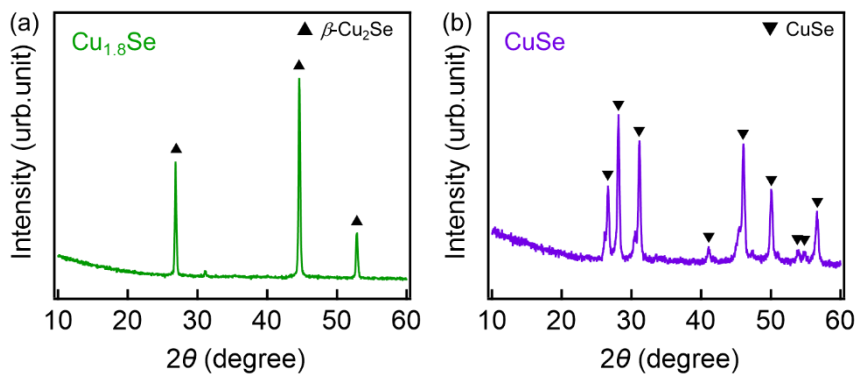

**Fig. S6** XRD patterns of (a) Cu<sub>1.8</sub>Se NWs and (b) CuSe NWs. Cu<sub>1.8</sub>Se (CuSe) NWs were synthesized with used Cu/Se ratio of 1.8 (1.0) by light irradiation for 12 (30) hours.

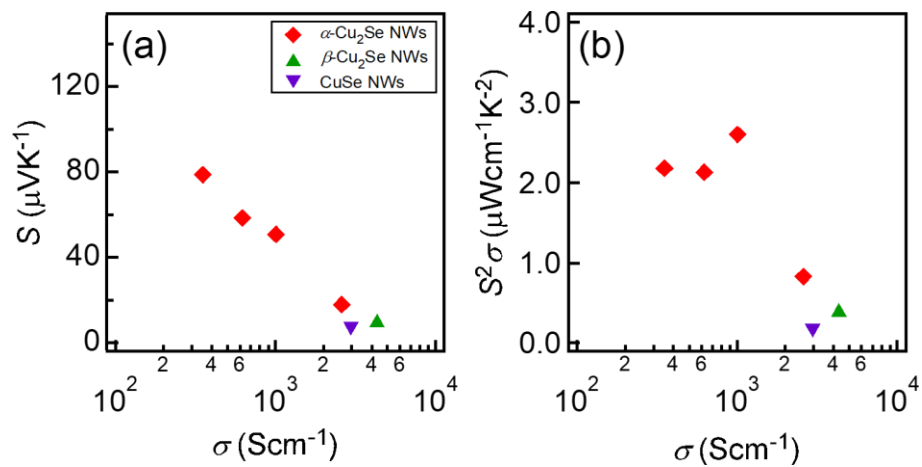

**Fig. S7** (a)  $S$  and (b)  $S^2\sigma$  as a function of  $\sigma$  of  $\alpha$ -Cu<sub>2+x</sub>Se NWs,  $\beta$ -Cu<sub>1.8</sub>Se NWs and CuSe NWs.

## References

- (S1) Yu, J.; Zhao, K.; Qiu, P.; Shi, X.; Chen, L. Thermoelectric Properties of Copper-Deficient  $\text{Cu}_{2-x}\text{Se}$  ( $0.05 \leq x \leq 0.25$ ) Binary Compounds. *Ceram. Int.* **2017**, *43*, 11142-11148.
- (S2) Tak, J. Y.; Nam, W. H.; Lee, C.; Kim, S.; Lim, Y. S.; Ko, K.; Lee, S.; Seo, W. S.; Cho, H. K.; Shim, J. H.; and Park, C. H. Ultralow Lattice Thermal Conductivity and Significantly Enhanced Near-Room-Temperature Thermoelectric Figure of Merit in  $\alpha\text{-Cu}_2\text{Se}$  through Suppressed Cu Vacancy Formation by Overstoichiometric Cu Addition. *Chem. Mater.* **2018**, *30*, 3276-3284.
- (S3) Li, Y.; Zhong, Y.; Zhang, D.; Niu, J.; Nisar, M.; Wei, M.; Liang, G.; Fan, P.; and Zheng, Z. Enhanced Thermoelectric Properties of  $\text{Cu}_2\text{Se}$  Flexible Thin Films by Optimizing Growth Temperature and Elemental Composition. *ACS Appl. Energy Mater.* **2022**, *5*, 13964-13970 .
- (S4) Fan, P.; Huang, X.; Chen, T.; Li, F.; Chen, Y.; Jabar, B.; Chen, S.; Ma, H.; Liang, G.; Luo, J.; Zhang, X.; and Zheng, Z.  $\alpha\text{-Cu}_2\text{Se}$  Thermoelectric Thin Films Prepared by Copper Sputtering into Selenium Precursor Layers. *Chem. Eng. J.* **2021**, *410*, 128444.
- (S5) Yang, L.; Wei, J.; Qin, Y.; Wei, L.; Song, P.; Zhang, M.; Yang, F.; and Wang, X. Thermoelectric Properties of  $\text{Cu}_2\text{Se}$  Nano-Thin Film by Magnetron Sputtering. *Materials* **2021**, *14*, 2075.
- (S6) Wang, A.; Xue, Y.; Wang, J.; Yang, X.; Wang, J.; Li, Z.; Wang, S. High Thermoelectric Performance of  $\text{Cu}_2\text{Se}$ -Based Thin Films with Adjustable Element Ratios by Pulsed Laser Deposition. *Mater. Today Energy* **2022**, *24*, 100929.
